# Supplementary material
Source: PubMed Central journal article supplement (PMC9974888)
Supplement: NIHMS1782093-supplement-1.pdf [file NIHMS1782093-supplement-1.pdf]

## Materials

| Name                                   | Company           | Catalog Number | Comments                                                                                                                                           |
|----------------------------------------|-------------------|----------------|----------------------------------------------------------------------------------------------------------------------------------------------------|
| 0.1-1.5mL Eppendorf tubes              | Fisher Scientific | 14-282-300     | Any vial or tube will do.                                                                                                                          |
| Autogrid clips                         | Thermo-Fisher     | 1036173        | Clipped grids are not required for MicroED. They are required for Thermo-Fisher TEMs equipped with an autoloader system.                           |
| Autogrid C-rings                       | Thermo-Fisher     | 1036171        |                                                                                                                                                    |
| Carbamazapine                          | Sigma             | C4024-1G       | Any amount will suffice for these experiments                                                                                                      |
| CMOS based detector                    | Thermo-Fisher     | CetaD 16M      | We used a CetaD 16M, but any detector with rolling shutter mode or sufficiently fast readout is acceptable.                                        |
| Delphi software                        | Thermo-Fisher     | N/A            | Software on Thermo-Fisher TEM systems that allows for manual rotation of the sample stage                                                          |
| EPU-D software                         | Thermo-Fisher     | N/A            | Commercial software for the acquisition of MicroED data                                                                                            |
| Glass cover slides                     | Hampton           | HR3-231        |                                                                                                                                                    |
| Glow discharger                        | Pelco             | easiGlow       |                                                                                                                                                    |
| High Precision Tweezers                | EMS               | 78325-AC       | Any high precision tweezer will do                                                                                                                 |
| Liquid nitrogen vessel                 | Spear Lab         | FD-800         | A standard foam vessel for handling specimens under liquid nitrogen - 800mL                                                                        |
| SerialEM software                      | UC Boulder        | N/A            | Free software distributed by D. Mastronarde. Department of Molecular, Cellular, and Developmental Biology                                          |
| TEM grids                              | Quantifoil/EMS    | Q310CMA        | Multi-A 300 mesh grids were used here, but any thin carbon grids will work. For these small molecules, we suggest starting with continuous carbon. |
| transmission electron microscope (TEM) | Thermo-Fisher     | Talos Arctica  |                                                                                                                                                    |
| Whatman circular filter paper          | Millipore-Sigma   | WHA1001090     | 90mm or larger                                                                                                                                     |
